# Supplementary material for: Anatomical and Functional Brain Abnormalities in Drug-Naive First-Episode Schizophrenia
Source: Atypon-hosted journal article supplement (doi:10.1176/appi.ajp.2013.12091148), 2013-06-04
Supplement: 1308_ds001.pdf [file 1308_ds001.pdf]

 


Psychiatry Online
